# Supplementary material for: Regulation of ICAM-1 in Cells of the Monocyte/Macrophage System in Microgravity
Source: Hindawi journal article supplement (doi:10.1155/2015/538786), 2015-01-01
Supplement: f1 [file 538786.f1.zip]

**TEXUS-49 - µg vs 1g - EPSTEIN-BARR VIRUS INFECTION**

| Gene Symbol | Gene name                                                    | Transcript ID | p-value | Fold-Change | Up / down-regulation |
|-------------|--------------------------------------------------------------|---------------|---------|-------------|----------------------|
| AKT1        | v-akt murine thymoma viral oncogene homolog 1                | BX647722      | 0.023   | 1.657       | µg up vs 1g          |
| ATF2        | activating transcription factor 2                            | NM_001880     | 0.018   | -2.558      | µg down vs 1g        |
| BCL2        | B-cell CLL/lymphoma 2                                        | NM_000657     | 0.048   | 1.594       | µg up vs 1g          |
| BST1        | bone marrow stromal cell antigen 1                           | NM_004334     | 0.003   | -2.615      | µg down vs 1g        |
| CCNA2       | cyclin A2                                                    | NM_001237     | 0.006   | -2.078      | µg down vs 1g        |
| CD19        | CD19 molecule                                                | NM_001770     | 0.044   | 1.743       | µg up vs 1g          |
| CD38        | CD38 molecule                                                | BC007964      | 0.041   | -1.646      | µg down vs 1g        |
| CD40        | CD40 molecule, TNF receptor superfamily member 5             | NM_001250     | 0.033   | 1.932       | µg up vs 1g          |
| CD44        | CD44 molecule (Indian blood group)                           | NM_000610     | 0.004   | -2.564      | µg down vs 1g        |
| CD58        | CD58 molecule                                                | X06296        | 0.007   | -3.963      | µg down vs 1g        |
| CDK1        | cyclin-dependent kinase 1                                    | NM_033379     | 0.002   | -3.012      | µg down vs 1g        |
| CDK2        | cyclin-dependent kinase 2                                    | NM_001798     | 0.013   | -1.580      | µg down vs 1g        |
| CDKN1B      | cyclin-dependent kinase inhibitor 1B (p27, Kip1)             | NM_004064     | 0.001   | -3.506      | µg down vs 1g        |
| CHUK        | conserved helix-loop-helix ubiquitous kinase                 | NM_001278     | 0.006   | -3.046      | µg down vs 1g        |
| CREBBP      | CREB binding protein (Rubinstein-Taybi syndrome)             | NM_004380     | 0.030   | -2.282      | µg down vs 1g        |
| CSNK2A1     | casein kinase 2, alpha 1 polypeptide                         | NM_001895     | 0.024   | -1.530      | µg down vs 1g        |
| EIF2AK2     | eukaryotic translation initiation factor 2-alpha kinase 2    | BC093676      | 0.004   | -1.975      | µg down vs 1g        |
| EIF2AK4     | eukaryotic translation initiation factor 2 alpha kinase 4    | NM_001013703  | 0.006   | -2.850      | µg down vs 1g        |
| EMB         | embigin homolog (mouse)                                      | NM_198449     | 0.013   | -3.546      | µg down vs 1g        |
| ENTPD8      | ectonucleoside triphosphate diphosphohydrolase 8             | NM_198585     | 0.021   | 1.805       | µg up vs 1g          |
| EP300       | E1A binding protein p300                                     | NM_001429     | 0.044   | -1.658      | µg down vs 1g        |
| GSK3B       | glycogen synthase kinase 3 beta                              | NM_002093     | 0.009   | -1.654      | µg down vs 1g        |
| GTF2B       | general transcription factor IIB                             | NM_001514     | 0.010   | -1.664      | µg down vs 1g        |
| GTF2E1      | general transcription factor IIE, polypeptide 1, alpha 56kDa | NM_005513     | 0.006   | -2.506      | µg down vs 1g        |
| GTF2E2      | general transcription factor IIE, polypeptide 2, beta 34kDa  | NM_002095     | 0.004   | -2.199      | µg down vs 1g        |

| Gene Symbol | Gene name                                                                   | Transcript ID | p-value | Fold-Change | Up / down-regulation |
|-------------|-----------------------------------------------------------------------------|---------------|---------|-------------|----------------------|
| HDAC5       | histone deacetylase 5                                                       | NM_001015053  | 0.039   | 1.654       | µg up vs 1g          |
| HLA-A       | major histocompatibility complex, class I, A                                | AK125608      | 0.028   | 1.624       | µg up vs 1g          |
| HLA-DRB1    | major histocompatibility complex, class II, DR beta 1                       | AB036991      | 0.002   | -2.135      | µg down vs 1g        |
| HSPB2       | heat shock 27kDa protein 2                                                  | NM_001541     | 0.016   | 2.081       | µg up vs 1g          |
| IKBKB       | inhibitor of kappa light polypeptide gene enhancer in B-cells, kinase beta  | NM_001556     | 0.030   | -1.608      | µg down vs 1g        |
| IL10        | interleukin 10                                                              | BC104252      | 0.042   | 1.540       | µg up vs 1g          |
| JAK1        | Janus kinase 1 (a protein tyrosine kinase)                                  | AB209057      | 0.018   | -1.637      | µg down vs 1g        |
| LYN         | v-yes-1 Yamaguchi sarcoma viral related oncogene homolog                    | NM_002350     | 0.002   | -1.640      | µg down vs 1g        |
| MAP2K4      | mitogen-activated protein kinase kinase 4                                   | NM_003010     | 0.027   | -2.140      | µg down vs 1g        |
| MAP3K7      | mitogen-activated protein kinase kinase kinase 7                            | NM_145331     | 0.014   | -2.325      | µg down vs 1g        |
| MAPK8       | mitogen-activated protein kinase 8                                          | NM_139047     | 0.006   | -3.835      | µg down vs 1g        |
| MAPK9       | mitogen-activated protein kinase 9                                          | NM_002752     | 0.011   | -3.423      | µg down vs 1g        |
| MAPK14      | mitogen-activated protein kinase 14                                         | NM_139013     | 0.015   | -1.635      | µg down vs 1g        |
| MDM2        | Mdm2, transformed 3T3 cell double minute 2, p53 binding protein (mouse)     | NM_006881     | 0.043   | -2.874      | µg down vs 1g        |
| NEDD4       | neural precursor cell expressed, developmentally down-regulated 4           | NM_198400     | 0.018   | -2.883      | µg down vs 1g        |
| NFKB1       | nuclear factor of kappa light polypeptide gene enhancer in B-cells 1 (p105) | NM_003998     | 0.018   | -1.843      | µg down vs 1g        |
| NUP214      | nucleoporin 214kDa                                                          | NM_005085     | 0.041   | -1.569      | µg down vs 1g        |
| PIK3CA      | phosphoinositide-3-kinase, catalytic, alpha polypeptide                     | NM_006218     | 0.019   | -3.460      | µg down vs 1g        |
| PIK3CB      | phosphoinositide-3-kinase, catalytic, beta polypeptide                      | NM_006219     | 0.008   | -3.202      | µg down vs 1g        |
| PIK3CG      | phosphoinositide-3-kinase, catalytic, gamma polypeptide                     | NM_002649     | 0.015   | -4.849      | µg down vs 1g        |
| PIK3R1      | phosphoinositide-3-kinase, regulatory subunit 1 (p85 alpha)                 | NM_181504     | 0.019   | -2.418      | µg down vs 1g        |
| PIK3R3      | phosphoinositide-3-kinase, regulatory subunit 3 (p55, gamma)                | NM_003629     | 0.021   | -2.685      | µg down vs 1g        |
| POLR2B      | polymerase (RNA) II (DNA directed) polypeptide B, 140kDa                    | NM_000938     | 0.014   | -1.690      | µg down vs 1g        |
| POLR2D      | polymerase (RNA) II (DNA directed) polypeptide D                            | BC093795      | 0.011   | -1.520      | µg down vs 1g        |
| POLR2H      | polymerase (RNA) II (DNA directed) polypeptide H                            | NM_006232     | 0.003   | -1.615      | µg down vs 1g        |

| Gene Symbol | Gene name                                                                        | Transcript ID | p-value | Fold-Change | Up / down-regulation |
|-------------|----------------------------------------------------------------------------------|---------------|---------|-------------|----------------------|
| POLR2J2     | DNA directed RNA polymerase II polypeptide J-related gene                        | NM_145325     | 0.024   | 1.505       | µg up vs 1g          |
| POLR2K      | polymerase (RNA) II (DNA directed) polypeptide K, 7.0kDa                         | BC018157      | 0.011   | -1.628      | µg down vs 1g        |
| POLR3A      | polymerase (RNA) III (DNA directed) polypeptide A, 155kDa                        | BC014399      | 0.038   | -2.005      | µg down vs 1g        |
| POLR3B      | polymerase (RNA) III (DNA directed) polypeptide B                                | NM_018082     | 0.018   | -2.797      | µg down vs 1g        |
| POLR3C      | polymerase (RNA) III (DNA directed) polypeptide C (62kD)                         | NM_006468     | 0.004   | -1.514      | µg down vs 1g        |
| POLR3E      | polymerase (RNA) III (DNA directed) polypeptide E (80kD)                         | NM_018119     | 0.018   | -1.559      | µg down vs 1g        |
| POLR3F      | polymerase (RNA) III (DNA directed) polypeptide F, 39 kDa                        | NM_006466     | 0.035   | -3.186      | µg down vs 1g        |
| POLR3GL     | polymerase (RNA) III (DNA directed) polypeptide G (32kD) like                    | NM_032305     | 0.005   | -1.846      | µg down vs 1g        |
| PRKACB      | protein kinase, cAMP-dependent, catalytic, beta                                  | NM_207578     | 0.022   | -4.445      | µg down vs 1g        |
| PRKACG      | protein kinase, cAMP-dependent, catalytic, gamma                                 | NM_002732     | 0.034   | 1.620       | µg up vs 1g          |
| PRKX        | protein kinase, X-linked                                                         | BC041073      | 0.016   | -2.500      | µg down vs 1g        |
| PSMC6       | proteasome (prosome, macropain) 26S subunit, ATPase, 6                           | NM_002806     | 0.003   | -2.377      | µg down vs 1g        |
| PSMD1       | proteasome (prosome, macropain) 26S subunit, non-ATPase, 1                       | NM_002807     | 0.003   | -2.305      | µg down vs 1g        |
| PSMD6       | proteasome (prosome, macropain) 26S subunit, non-ATPase, 6                       | NM_014814     | 0.007   | -1.542      | µg down vs 1g        |
| PSMD12      | proteasome (prosome, macropain) 26S subunit, non-ATPase, 12                      | NM_002816     | 0.003   | -3.215      | µg down vs 1g        |
| PSMD14      | proteasome (prosome, macropain) 26S subunit, non-ATPase, 14                      | NM_005805     | 0.014   | -1.753      | µg down vs 1g        |
| RB1         | retinoblastoma 1 (including osteosarcoma)                                        | NM_000321     | 0.001   | -2.945      | µg down vs 1g        |
| RBPJ        | recombination signal binding protein for immunoglobulin kappa J region           | BC020780      | 0.007   | -1.581      | µg down vs 1g        |
| RBPJL       | recombining binding protein suppressor of hairless (Drosophila)-like             | AB024964      | 0.048   | 1.686       | µg up vs 1g          |
| RIPK1       | receptor (TNFRSF)-interacting serine-threonine kinase 1                          | NM_003804     | 0.034   | -1.864      | µg down vs 1g        |
| RPN2        | ribophorin II                                                                    | BC020222      | 0.010   | -1.629      | µg down vs 1g        |
| SHFM1       | split hand/foot malformation (ectrodactyly) type 1                               | NM_006304     | 0.004   | -2.457      | µg down vs 1g        |
| SKP2        | S-phase kinase-associated protein 2 (p45)                                        | NM_005983     | 0.015   | -1.677      | µg down vs 1g        |
| SNW1        | SNW domain containing 1                                                          | NM_012245     | 0.004   | -1.672      | µg down vs 1g        |
| STAT3       | signal transducer and activator of transcription 3 (acute-phase response factor) | NM_213662     | 0.022   | -2.066      | µg down vs 1g        |

| Gene Symbol | Gene name                                                                               | Transcript ID | p-value | Fold-Change | Up / down-regulation |
|-------------|-----------------------------------------------------------------------------------------|---------------|---------|-------------|----------------------|
| TAB2        | TGF-beta activated kinase 1/MAP3K7 binding protein 2                                    | BC035910      | 0.015   | -3.617      | µg down vs 1g        |
| TBPL1       | TBP-like 1                                                                              | NM_004865     | 0.006   | -2.211      | µg down vs 1g        |
| TNFAIP3     | tumor necrosis factor, alpha-induced protein 3                                          | BC114480      | 0.009   | -2.410      | µg down vs 1g        |
| TRAF3       | TNF receptor-associated factor 3                                                        | NM_003300     | 0.001   | -1.512      | µg down vs 1g        |
| TRAF5       | TNF receptor-associated factor 5                                                        | NM_001033910  | 0.033   | -1.551      | µg down vs 1g        |
| TRAF6       | TNF receptor-associated factor 6                                                        | NM_004620     | 0.037   | -2.093      | µg down vs 1g        |
| XPO1        | exportin 1 (CRM1 homolog, yeast)                                                        | NM_003400     | 0.002   | -1.997      | µg down vs 1g        |
| YWHAB       | tyrosine 3-monooxygenase/tryptophan 5-monooxygenase activation protein, beta polypeptid | BC001359      | 0.003   | -1.722      | µg down vs 1g        |
| YWHAG       | tyrosine 3-monooxygenase/tryptophan 5-monooxygenase activation protein, gamma polypept  | NM_012479     | 0.009   | -2.206      | µg down vs 1g        |
| YWHAH       | tyrosine 3-monooxygenase/tryptophan 5-monooxygenase activation protein, eta polypeptid  | NM_003405     | 0.015   | -1.669      | µg down vs 1g        |
| YWHAZ       | tyrosine 3-monooxygenase/tryptophan 5-monooxygenase activation protein, zeta polypeptid | NM_003406     | 0.002   | -1.647      | µg down vs 1g        |
