# Supplementary material for: Regulation of ICAM-1 in Cells of the Monocyte/Macrophage System in Microgravity
Source: Hindawi journal article supplement (doi:10.1155/2015/538786), 2015-01-01
Supplement: f1 [file 538786.f1.zip]

**TEXUS-49 - µg vs 1g - NF-KAPPA B SIGNALING PATHWAY**

| Gene Symbol  | Gene name                                                                  | Transcript ID | p-value | Fold-Change | Up / down-regulation |
|--------------|----------------------------------------------------------------------------|---------------|---------|-------------|----------------------|
| ATM          | ataxia telangiectasia mutated (includes complementation groups A, C and D) | NM_000051     | 0.021   | -2.239      | µg down vs 1g        |
| BCL2         | B-cell CLL/lymphoma 2                                                      | NM_000657     | 0.048   | 1.594       | µg up vs 1g          |
| BCL10        | B-cell CLL/lymphoma 10                                                     | BC053617      | 0.009   | -2.443      | µg down vs 1g        |
| BIRC2        | baculoviral IAP repeat-containing 2                                        | NM_001166     | 0.008   | -4.046      | µg down vs 1g        |
| BLNK         | B-cell linker                                                              | NM_013314     | 0.015   | -1.836      | µg down vs 1g        |
| CARD11       | caspase recruitment domain family, member 11                               | NM_032415     | 0.015   | 4.774       | µg up vs 1g          |
| CCL4L2       | chemokine (C-C motif) ligand 4-like 2                                      | AY766457      | 0.042   | 1.816       | µg up vs 1g          |
| CCL19        | chemokine (C-C motif) ligand 19                                            | NM_006274     | 0.016   | 1.782       | µg up vs 1g          |
| CCL21        | chemokine (C-C motif) ligand 21                                            | BC027918      | 0.038   | 1.627       | µg up vs 1g          |
| CD40         | CD40 molecule, TNF receptor superfamily member 5                           | NM_001250     | 0.033   | 1.932       | µg up vs 1g          |
| CHUK         | conserved helix-loop-helix ubiquitous kinase                               | NM_001278     | 0.006   | -3.046      | µg down vs 1g        |
| CSNK2A1      | casein kinase 2, alpha 1 polypeptide                                       | NM_001895     | 0.024   | -1.530      | µg down vs 1g        |
| CXCL12       | chemokine (C-X-C motif) ligand 12 (stromal cell-derived factor 1)          | NM_001033886  | 0.009   | 2.159       | µg up vs 1g          |
| ERC1/RAB6IP2 | RAB6 interacting protein 2                                                 | NM_015064     | 0.045   | -1.878      | µg down vs 1g        |
| IKBKB        | inhibitor of kappa light polypeptide gene enhancer in B-cells, kinase beta | NM_001556     | 0.030   | -1.608      | µg down vs 1g        |
| IL1B         | interleukin 1, beta                                                        | NM_000576     | 0.014   | -1.538      | µg down vs 1g        |
| IL8          | interleukin 8                                                              | NM_000584     | 0.006   | -3.175      | µg down vs 1g        |
| IRAK4        | interleukin-1 receptor-associated kinase 4                                 | NM_016123     | 0.012   | -2.498      | µg down vs 1g        |
| LCK          | lymphocyte-specific protein tyrosine kinase                                | U23852        | 0.043   | 3.615       | µg up vs 1g          |
| LTA          | lymphotoxin alpha (TNF superfamily, member 1)                              | DQ123822      | 0.009   | 2.031       | µg up vs 1g          |
| LYN          | v-src-1 Yamaguchi sarcoma viral related oncogene homolog                   | NM_002350     | 0.002   | -1.640      | µg down vs 1g        |
| MAL          | mal, T-cell differentiation protein                                        | BC003006      | 0.032   | 2.990       | µg up vs 1g          |
| MALT1        | mucosa associated lymphoid tissue lymphoma translocation gene 1            | BC030143      | 0.012   | -3.701      | µg down vs 1g        |
| MAP3K7       | mitogen-activated protein kinase kinase kinase 7                           | NM_145331     | 0.014   | -2.325      | µg down vs 1g        |

| Gene Symbol | Gene name                                                                   | Transcript ID | p-value | Fold-Change | Up / down-regulation |
|-------------|-----------------------------------------------------------------------------|---------------|---------|-------------|----------------------|
| NFKB1       | nuclear factor of kappa light polypeptide gene enhancer in B-cells 1 (p105) | NM_003998     | 0.018   | -1.843      | µg down vs 1g        |
| PIDD/LRDD   | leucine-rich repeats and death domain containing                            | NM_018494     | 0.024   | 1.662       | µg up vs 1g          |
| PRKCB       | protein kinase C, beta 1                                                    | BC036472      | 0.003   | -1.624      | µg down vs 1g        |
| PRKCQ       | protein kinase C, theta                                                     | NM_006257     | 0.009   | -1.905      | µg down vs 1g        |
| RIPK1       | receptor (TNFRSF)-interacting serine-threonine kinase 1                     | NM_003804     | 0.034   | -1.864      | µg down vs 1g        |
| TAB2        | mitogen-activated protein kinase kinase kinase 7 interacting protein 2      | BC035910      | 0.015   | -3.617      | µg down vs 1g        |
| TICAM2      | toll-like receptor adaptor molecule 2                                       | NM_021649     | 0.024   | -2.373      | µg down vs 1g        |
| TLR4        | toll-like receptor 4                                                        | NM_138557     | 0.024   | -3.937      | µg down vs 1g        |
| TNFAIP3     | tumor necrosis factor, alpha-induced protein 3                              | BC114480      | 0.009   | -2.410      | µg down vs 1g        |
| TNFRSF13C   | tumor necrosis factor receptor superfamily, member 13C                      | NM_052945     | 0.015   | 1.987       | µg up vs 1g          |
| TNFSF13B    | tumor necrosis factor (ligand) superfamily, member 13b                      | BC020674      | 0.019   | -1.768      | µg down vs 1g        |
| TNFSF14     | tumor necrosis factor (ligand) superfamily, member 14                       | NM_003807     | 0.014   | 1.522       | µg up vs 1g          |
| TRAF3       | TNF receptor-associated factor 3                                            | NM_003300     | 0.001   | -1.512      | µg down vs 1g        |
| TRAF5       | TNF receptor-associated factor 5                                            | NM_001033910  | 0.033   | -1.551      | µg down vs 1g        |
| TRAF6       | TNF receptor-associated factor 6                                            | NM_004620     | 0.037   | -2.093      | µg down vs 1g        |
| UBE2I       | ubiquitin-conjugating enzyme E2I (UBC9 homolog, yeast)                      | BC000744      | 0.014   | 1.977       | µg up vs 1g          |
| XIAP        | baculoviral IAP repeat-containing 4                                         | BC032729      | 0.039   | -2.683      | µg down vs 1g        |
| ZAP70       | zeta-chain (TCR) associated protein kinase 70kDa                            | NM_207519     | 0.032   | 1.690       | µg up vs 1g          |
