# Supplementary material for: Regulation of ICAM-1 in Cells of the Monocyte/Macrophage System in Microgravity
Source: Hindawi journal article supplement (doi:10.1155/2015/538786), 2015-01-01
Supplement: f1 [file 538786.f1.zip]

**19th DLR PFC - µg vs 1g - NATURAL KILLER CELL MEDIATED CYTOTOXICITY**

| Gene Symbol | Gene name                                                                        | Transcript ID | p-value | Fold-Change | Up / down-regulation |
|-------------|----------------------------------------------------------------------------------|---------------|---------|-------------|----------------------|
| BID         | BH3 interacting domain death agonist                                             | BC009197      | 0.023   | -1.570      | µg down vs 1g        |
| BRAF        | v-raf murine sarcoma viral oncogene homolog B1                                   | NM_004333     | 0.033   | -1.607      | µg down vs 1g        |
| IFNA6       | interferon, alpha 6                                                              | NM_021002     | 0.048   | 1.741       | µg up vs 1g          |
| IFNA14      | interferon, alpha 14                                                             | NM_002172     | 0.046   | 1.632       | µg up vs 1g          |
| KIR2DS2     | killer cell immunoglobulin-like receptor, two domains, short cytoplasmic tail, 2 | AJ002104      | 0.049   | 1.869       | µg up vs 1g          |
| PIK3R1      | phosphoinositide-3-kinase, regulatory subunit 1 (p85 alpha)                      | BC094795      | 0.034   | -1.839      | µg down vs 1g        |
| PIK3R3      | phosphoinositide-3-kinase, regulatory subunit 3 (p55, gamma)                     | AF028785      | 0.037   | -1.595      | µg down vs 1g        |
| PRKCG       | protein kinase C, gamma                                                          | BC047876      | 0.027   | 1.542       | µg up vs 1g          |
| RAET1E      | retinoic acid early transcript 1E                                                | BC101976      | 0.042   | 1.502       | µg up vs 1g          |
| VAV2        | vav 2 oncogene                                                                   | AK130475      | 0.033   | 1.606       | µg up vs 1g          |
