# Supplementary material for: Regulation of ICAM-1 in Cells of the Monocyte/Macrophage System in Microgravity
Source: Hindawi journal article supplement (doi:10.1155/2015/538786), 2015-01-01

# NF-KAPPA B SIGNALING PATHWAY

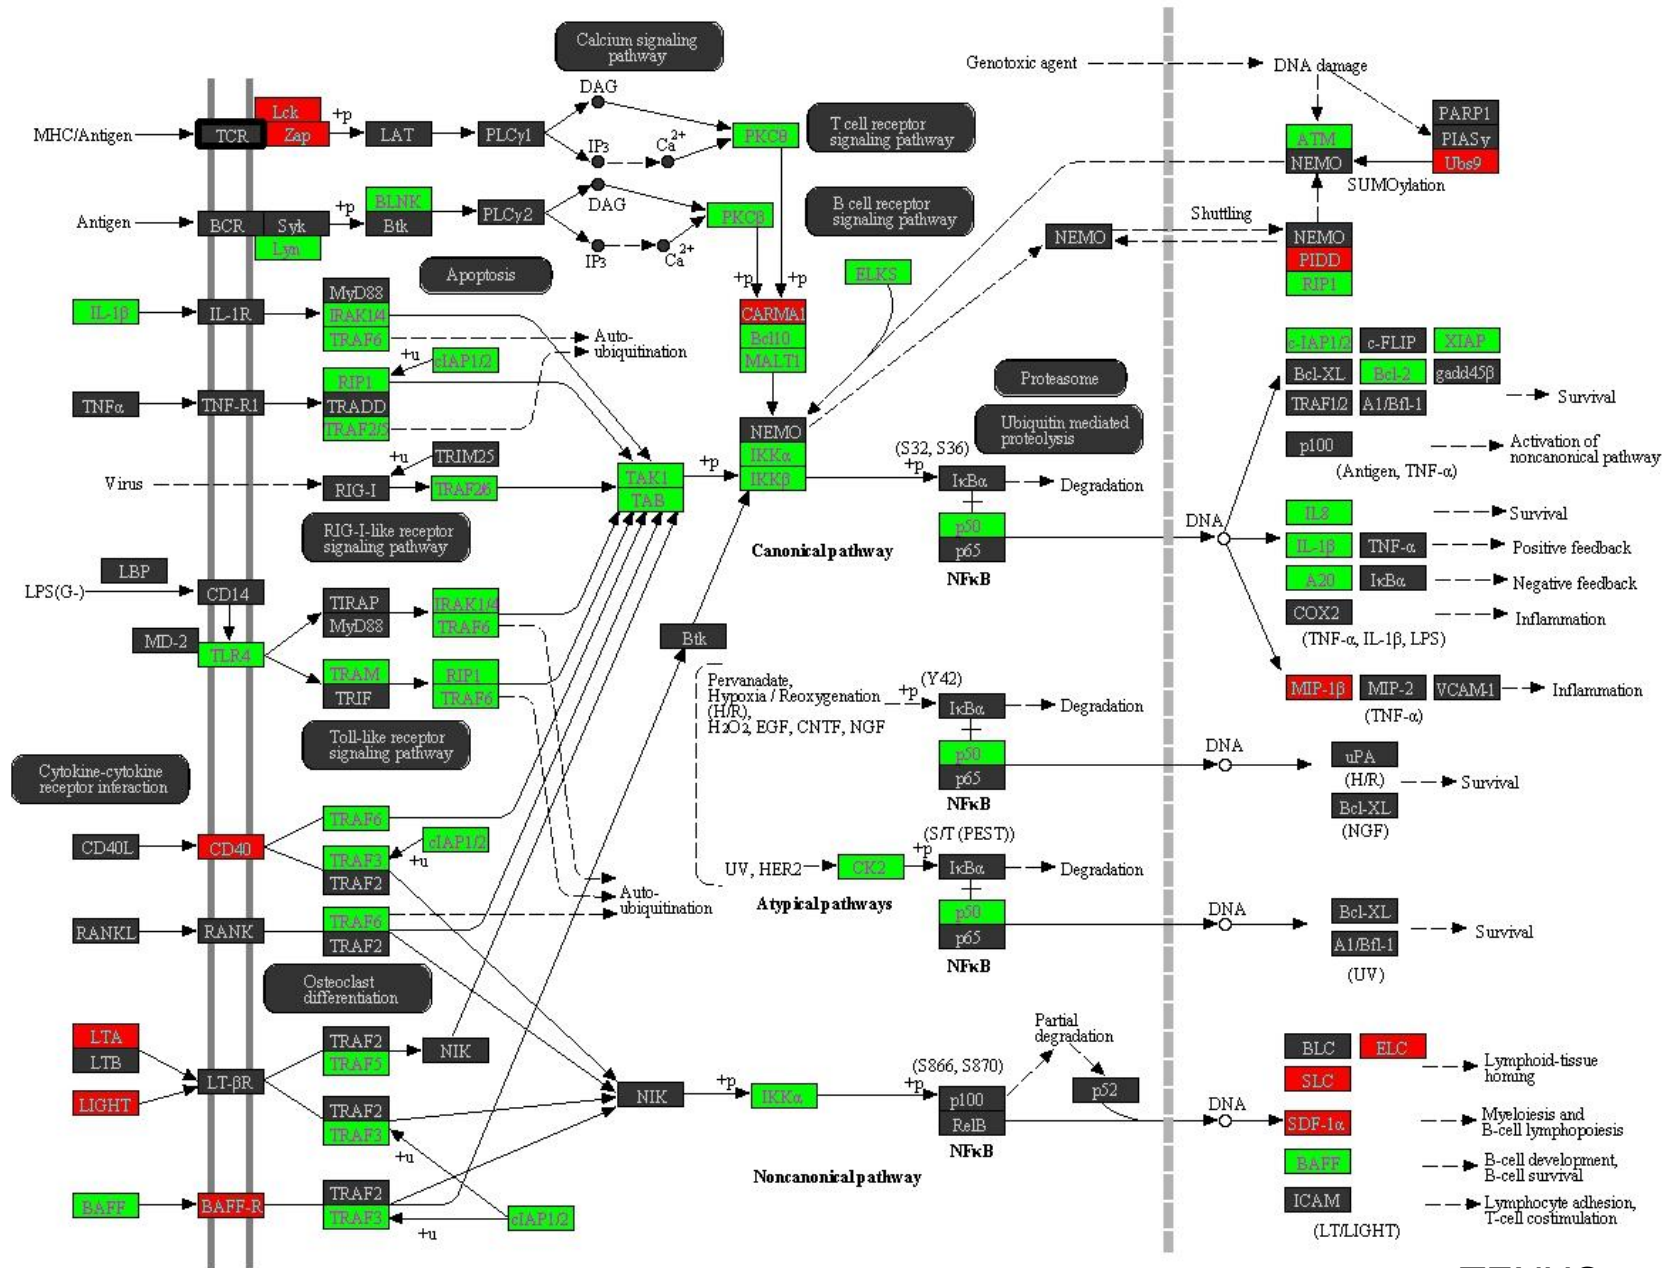

# EPSTEIN-BARR VIRUS INFECTION

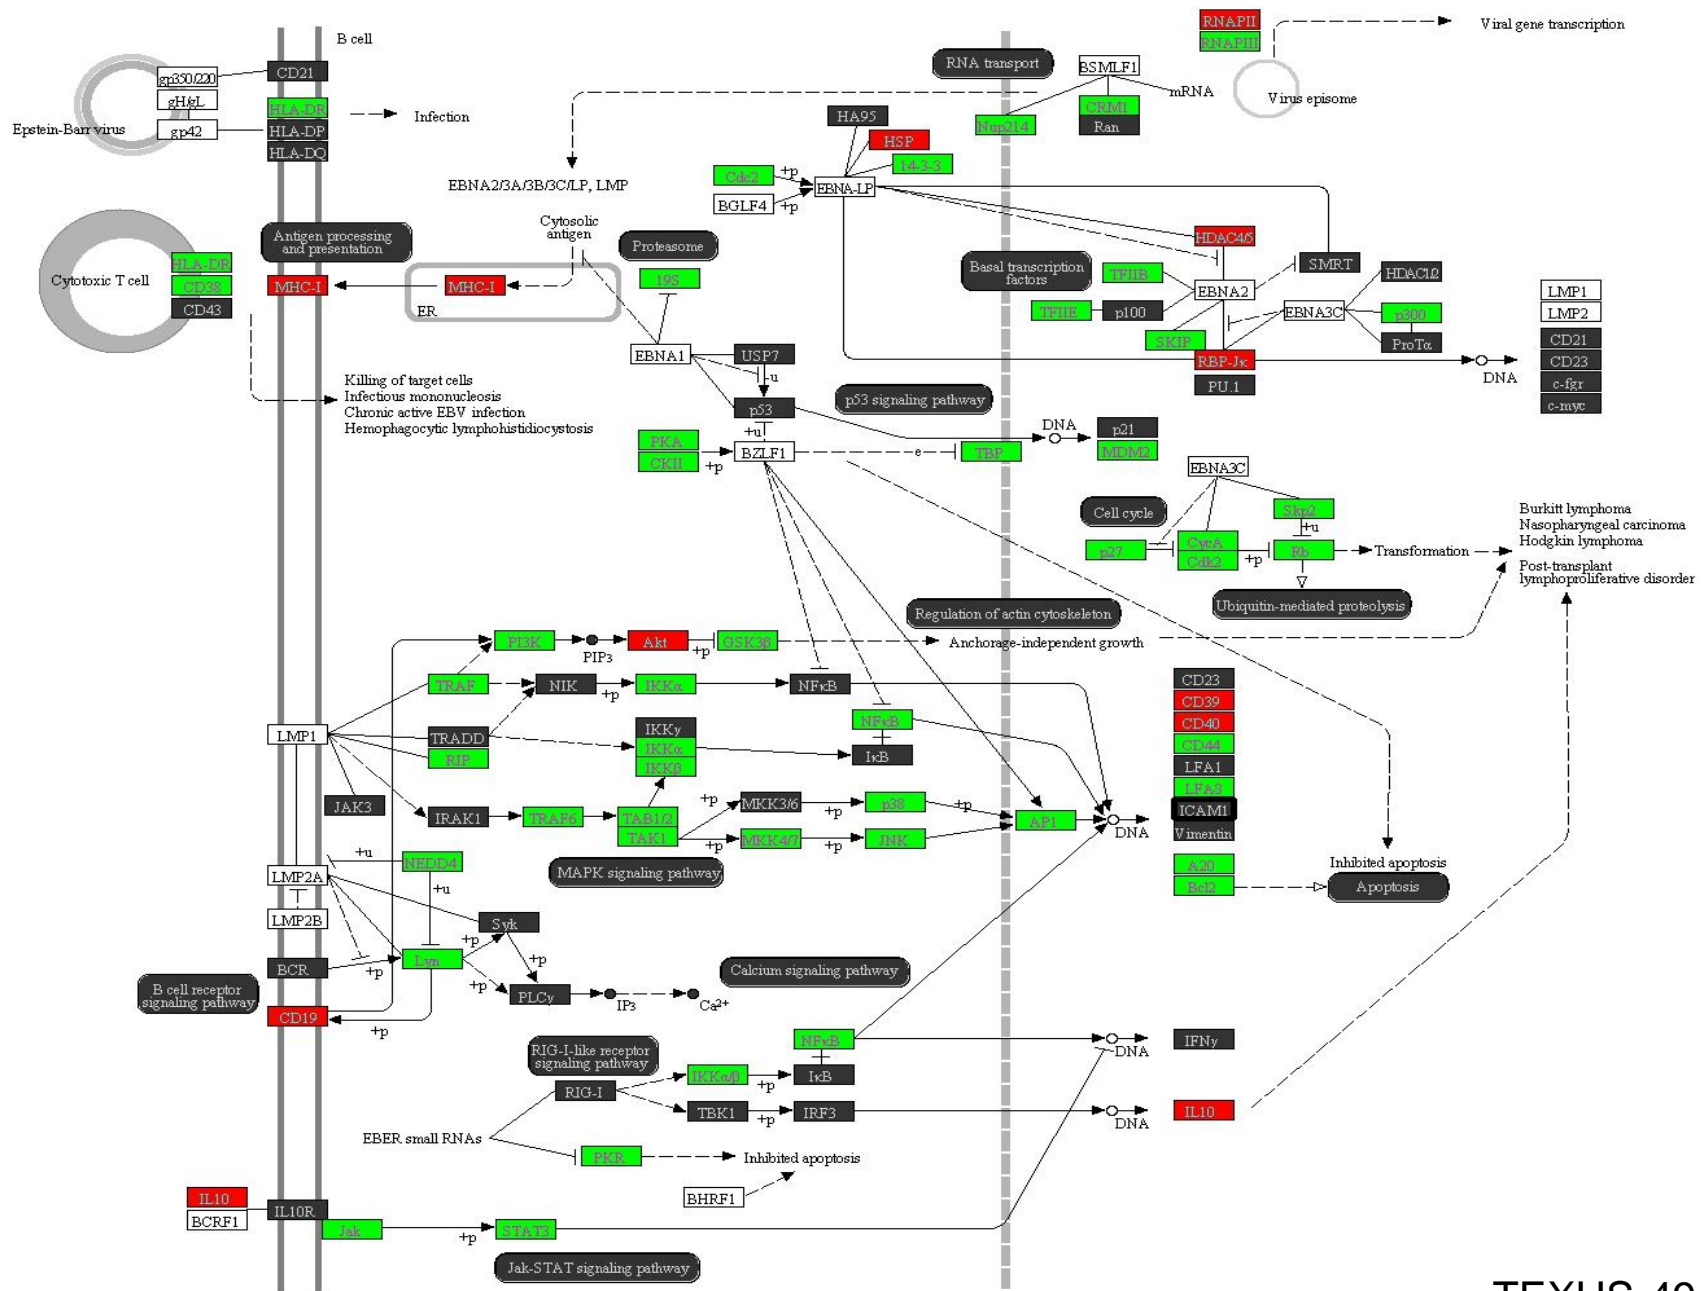

## NATURAL KILLER CELL MEDIATED CYTOTOXICITY

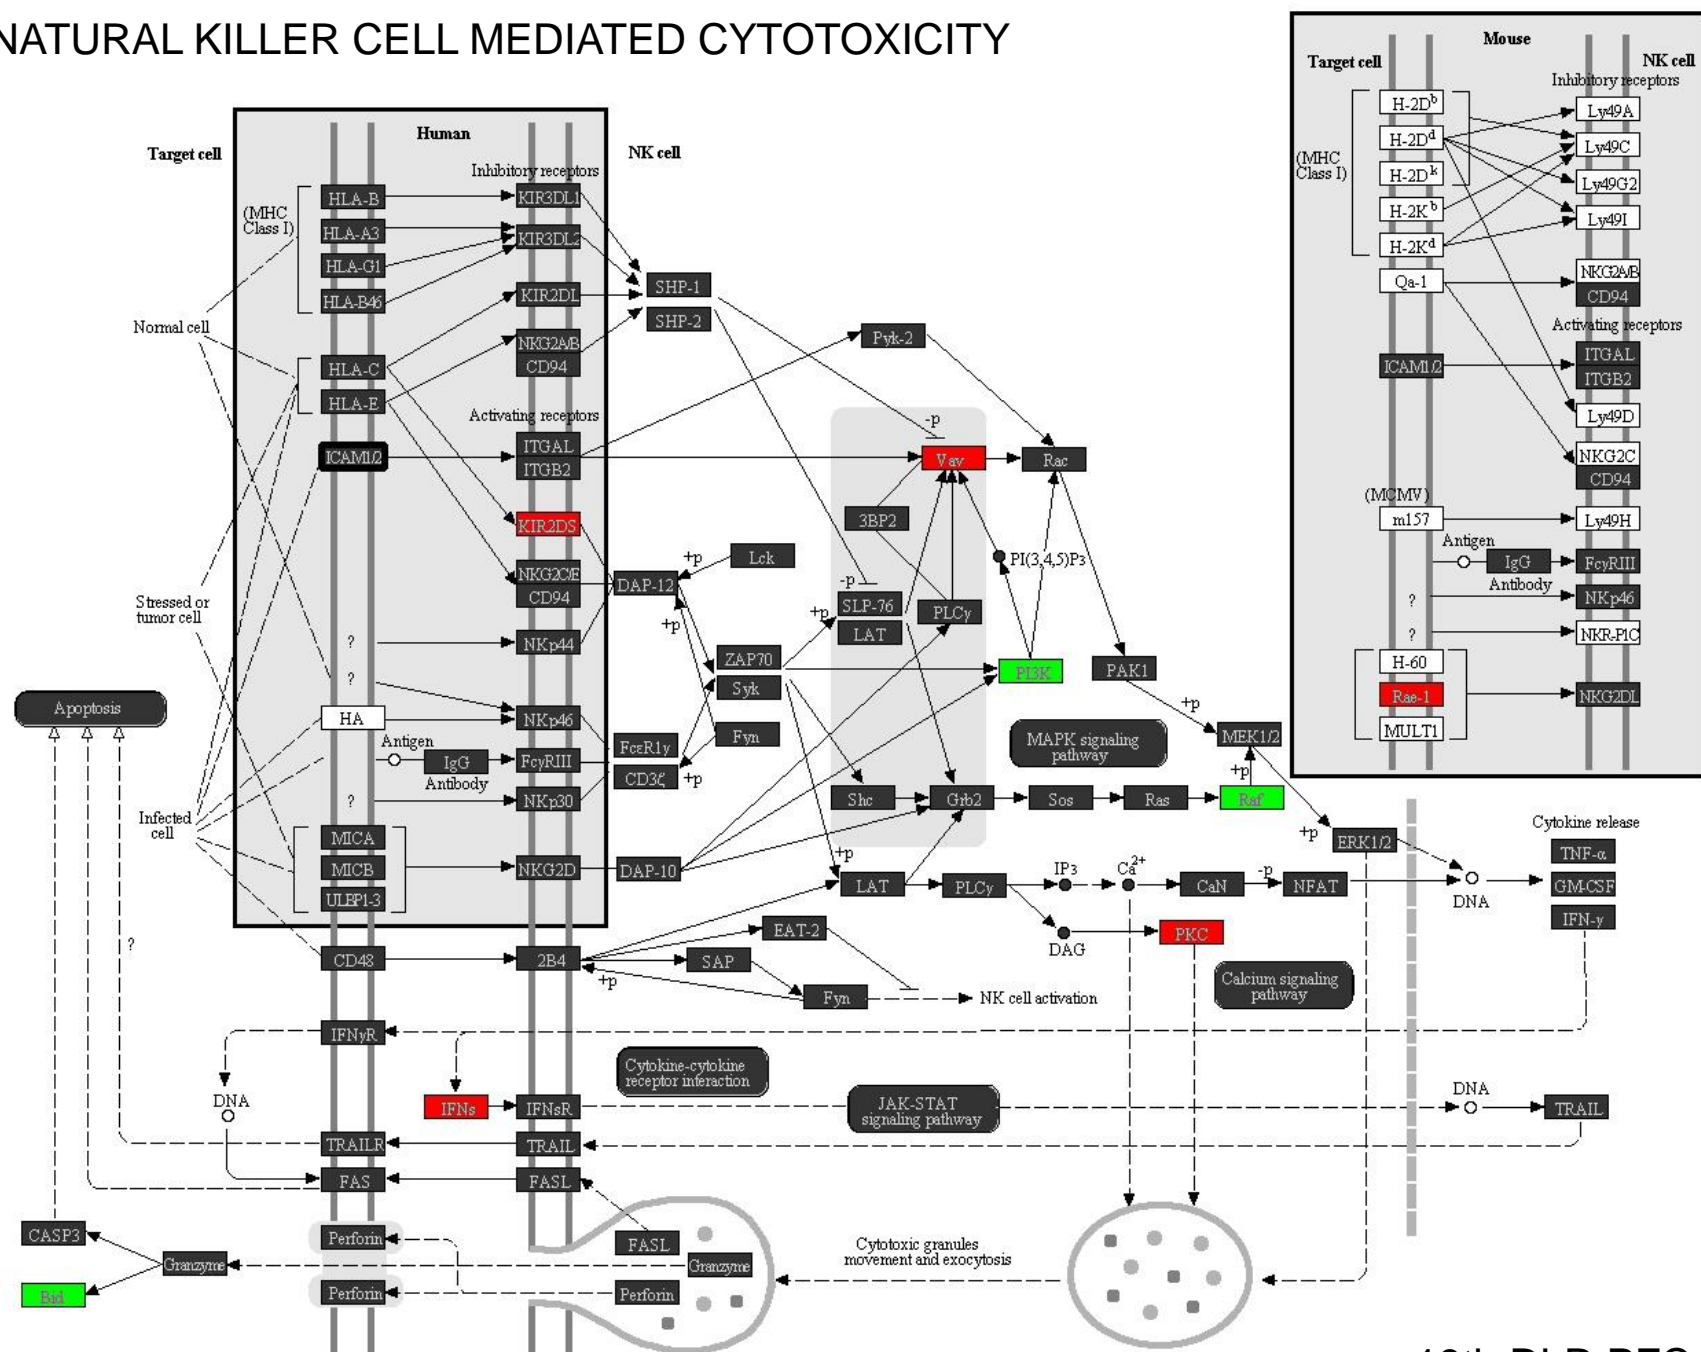

Supplement: f1 [file 538786.f1.zip]
